# Supplementary material for: Investigating the antibacterial, antioxidant, cytotoxic, and computational studies of Co( ii ) and Zn( ii ) compounds of heteroatom-based dicarboxylic acids
Source: Royal Society of Chemistry journal article supplement (doi:10.1039/d5nj04705f), 2025-12-09
Supplement: d5nj04705f1.pdf [file d5nj04705f1.pdf]

## Supplementary Information

### Investigating the antibacterial, antioxidant, cytotoxic, and computational studies of Co(II) and Zn(II) compounds of heteroatom-based dicarboxylic acids

Jyoti<sup>a</sup>, Priya Bhardwaj<sup>b</sup>, Mulaka Maruthi<sup>b\*</sup>, Sumit Mittal<sup>c\*</sup>, Anee Mohanty<sup>d\*</sup>, Sadhika Khullar<sup>a\*</sup>

<sup>a</sup>Department of Chemistry, Dr. B R Ambedkar National Institute of Technology Jalandhar, Punjab, 144008, India

<sup>b</sup>Department of Biochemistry, Central University of Haryana, Mehendergarh, Haryana, 123031, India.

<sup>c</sup> School of Advanced Science and Languages, VIT Bhopal University, Sehore, Madhya Pradesh, 466114, India

<sup>d</sup>Department of Biotechnology, Dr. B R Ambedkar National Institute of Technology, Jalandhar, Punjab, 144008, India

Corresponding author email: [mohantya@nitj.ac.in](mailto:mohantya@nitj.ac.in), [Sumit.mittal@vitbhopal.ac.in](mailto:Sumit.mittal@vitbhopal.ac.in), [khullars@nitj.ac.in](mailto:khullars@nitj.ac.in)

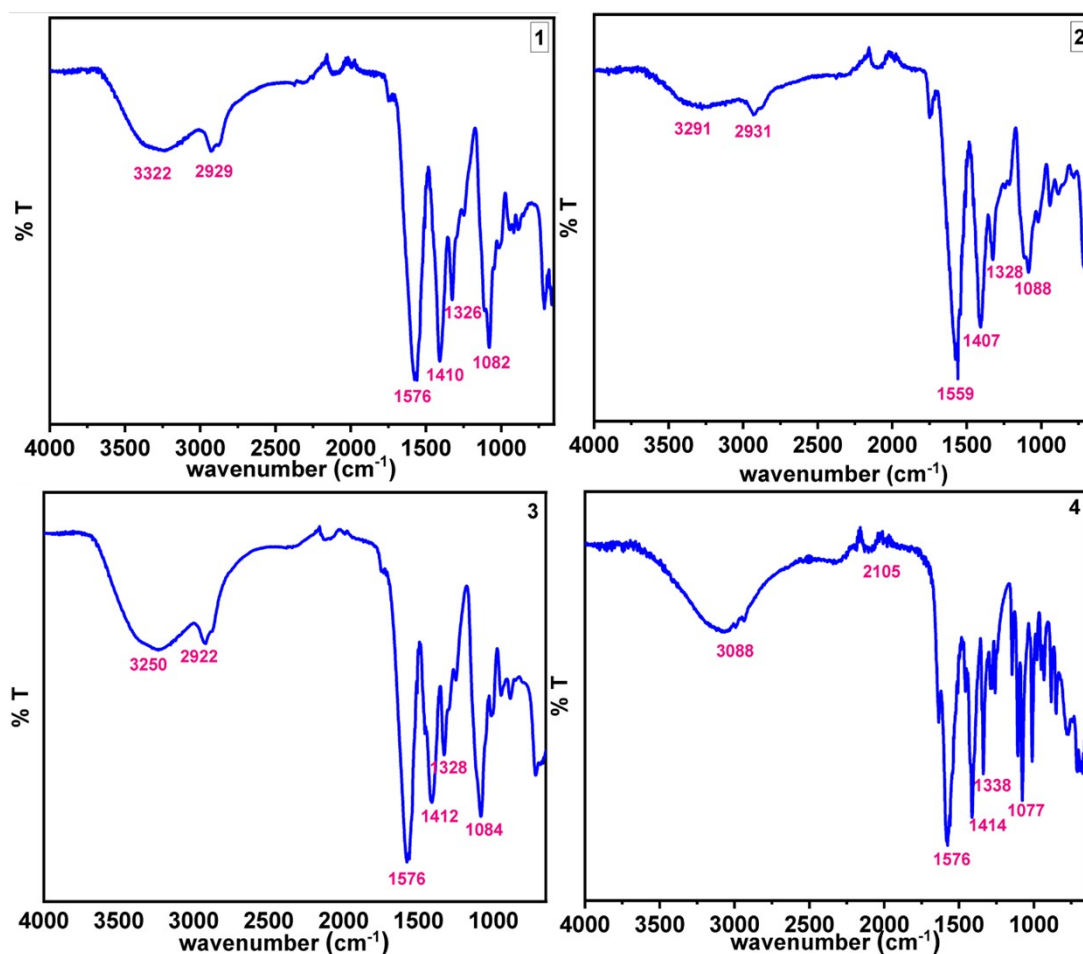

Fig. S1. FTIR spectra of 1-4.

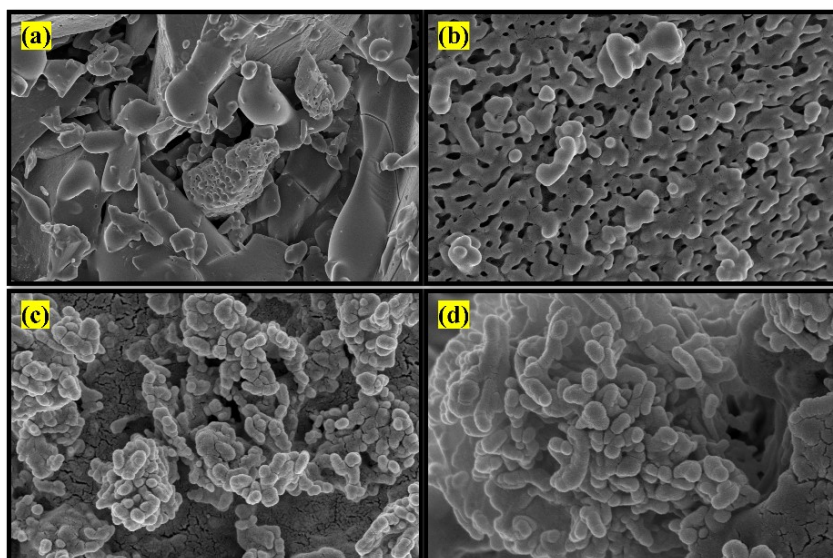

NEW2 | New Sample | Area 437 | Full Area 1

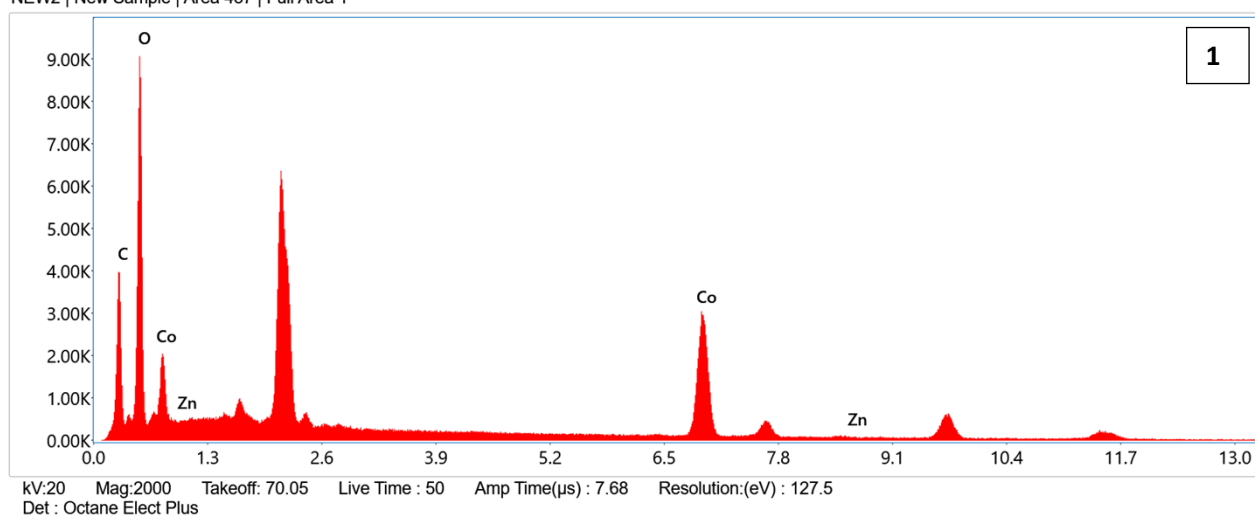

NEW2 | New Sample | Area 438 | Full Area 2

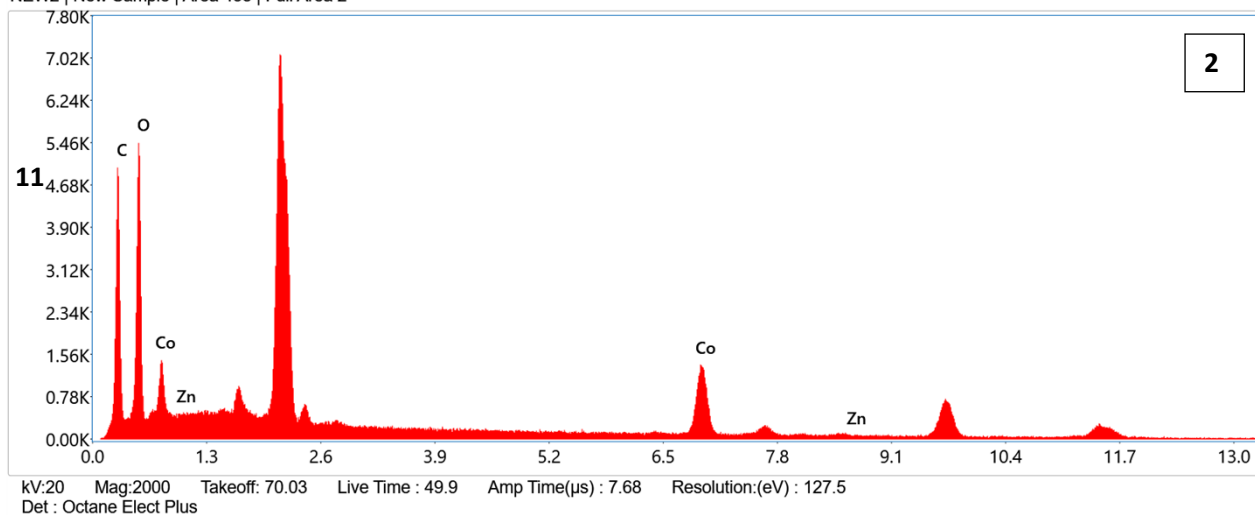

NEW2 | New Sample | Area 436 | Free Draw 1

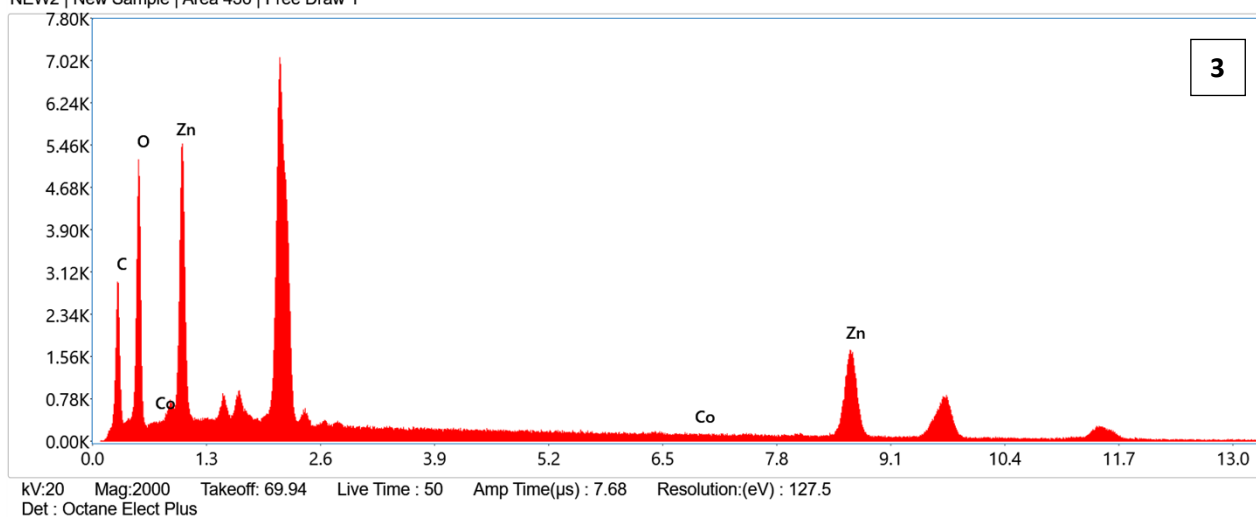

NEW2|New Sample|Area 435

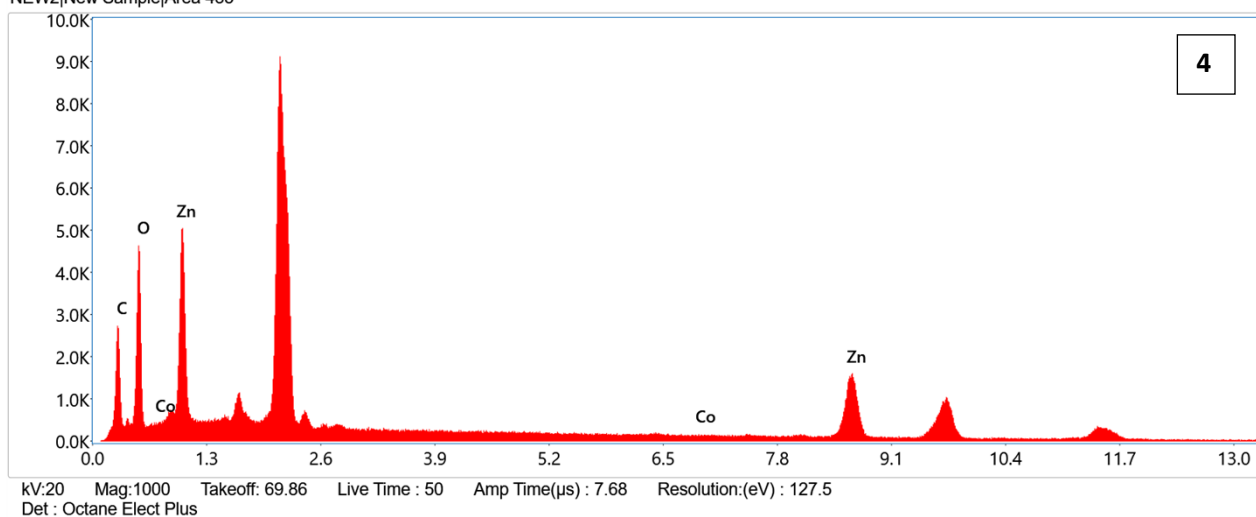

**Fig. S2.** FE-SEM images of 1-4 and EDX spectra of 1-4.

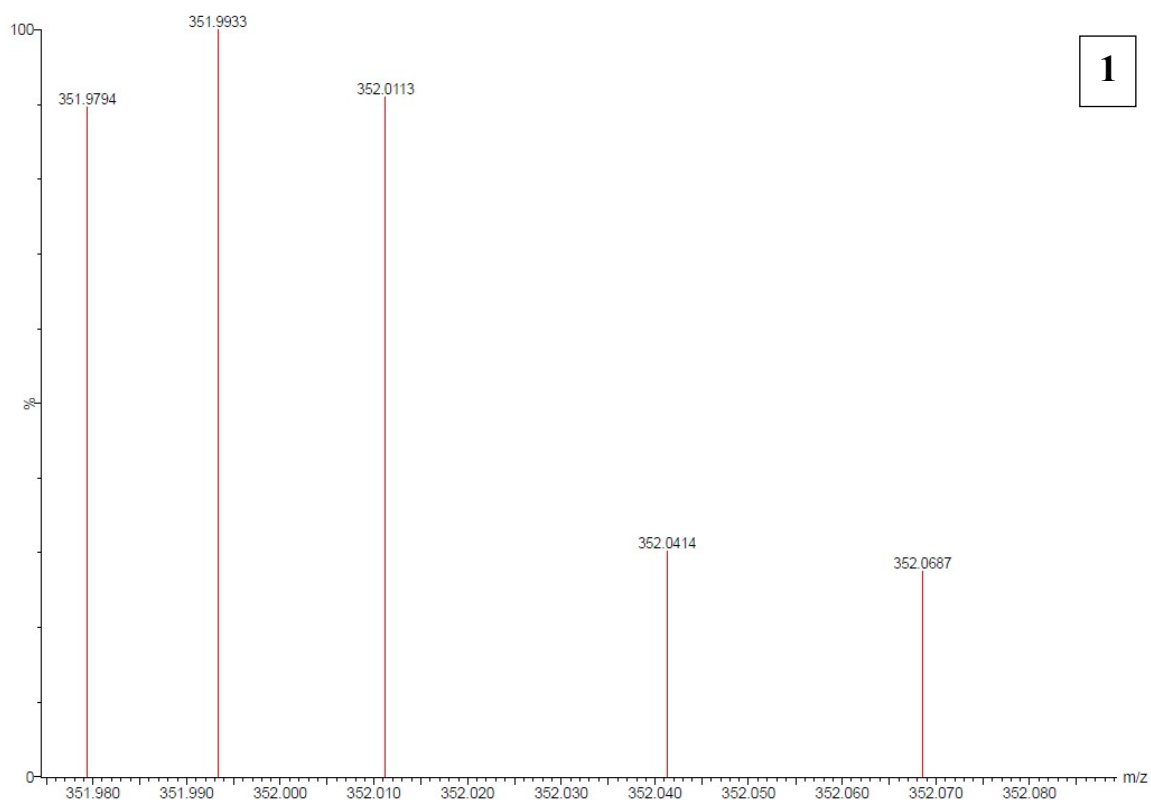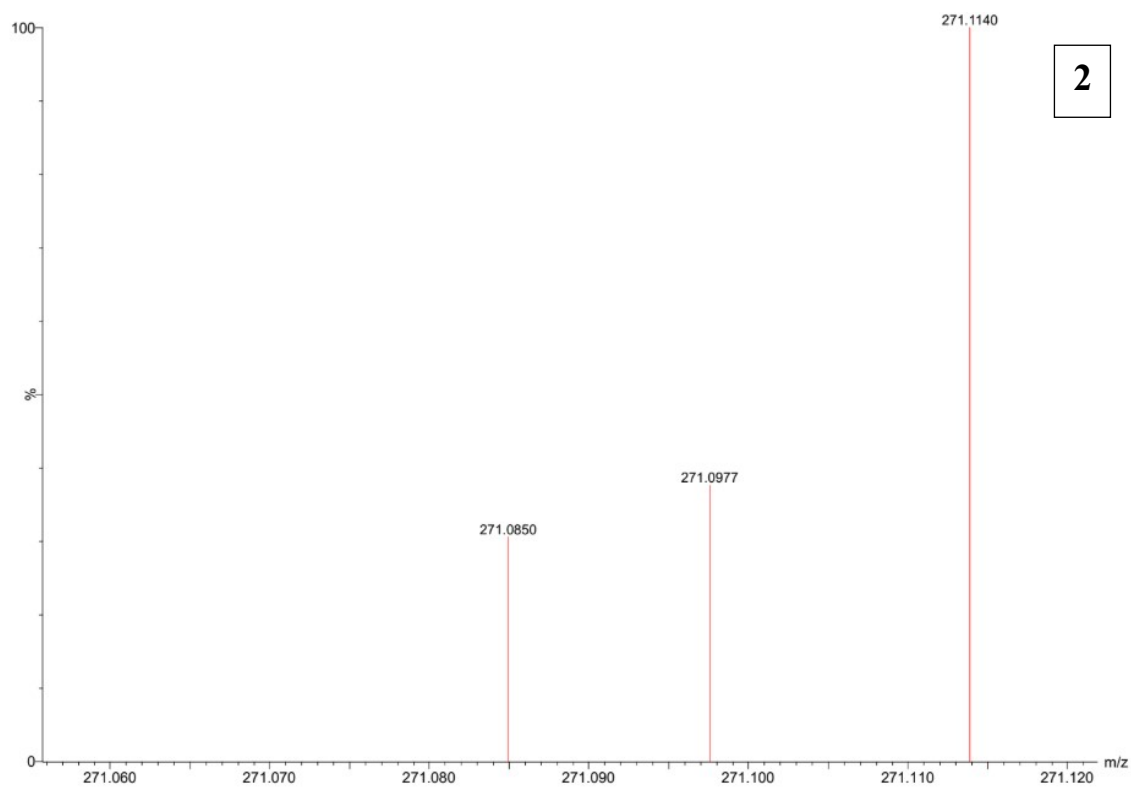

**Fig. S3. Mass spectra of 1-2.**

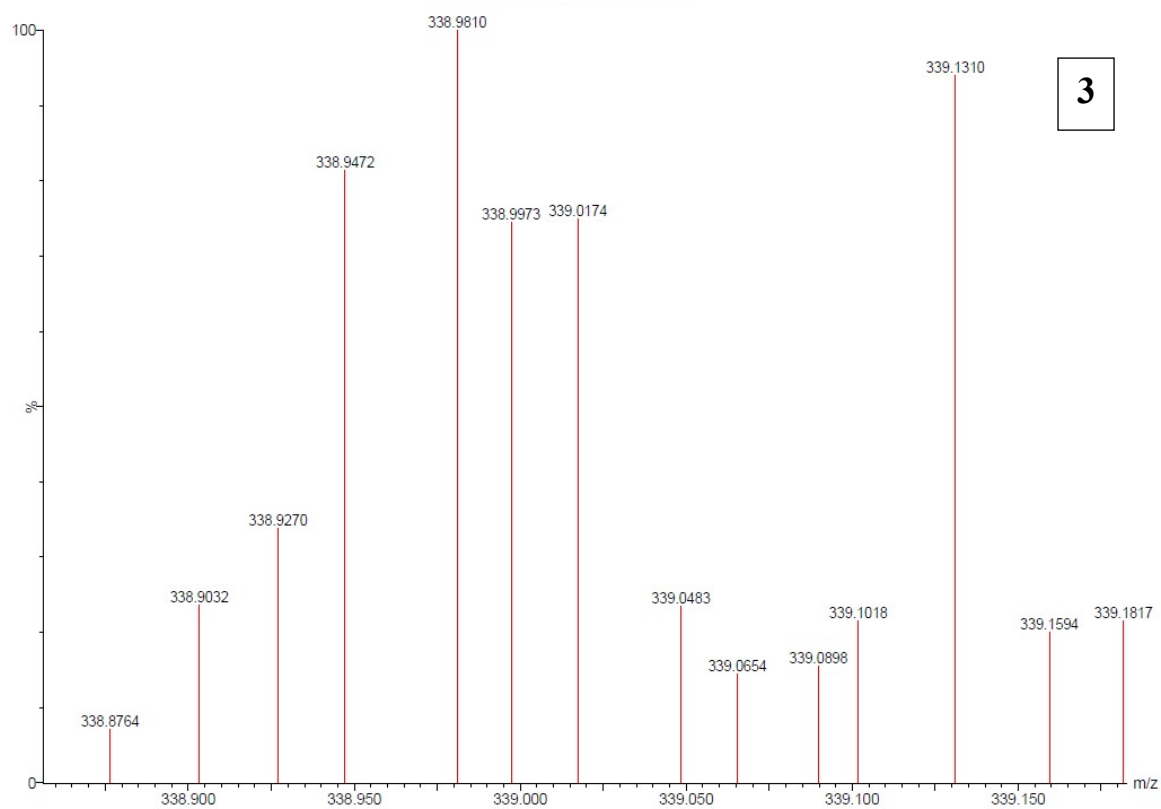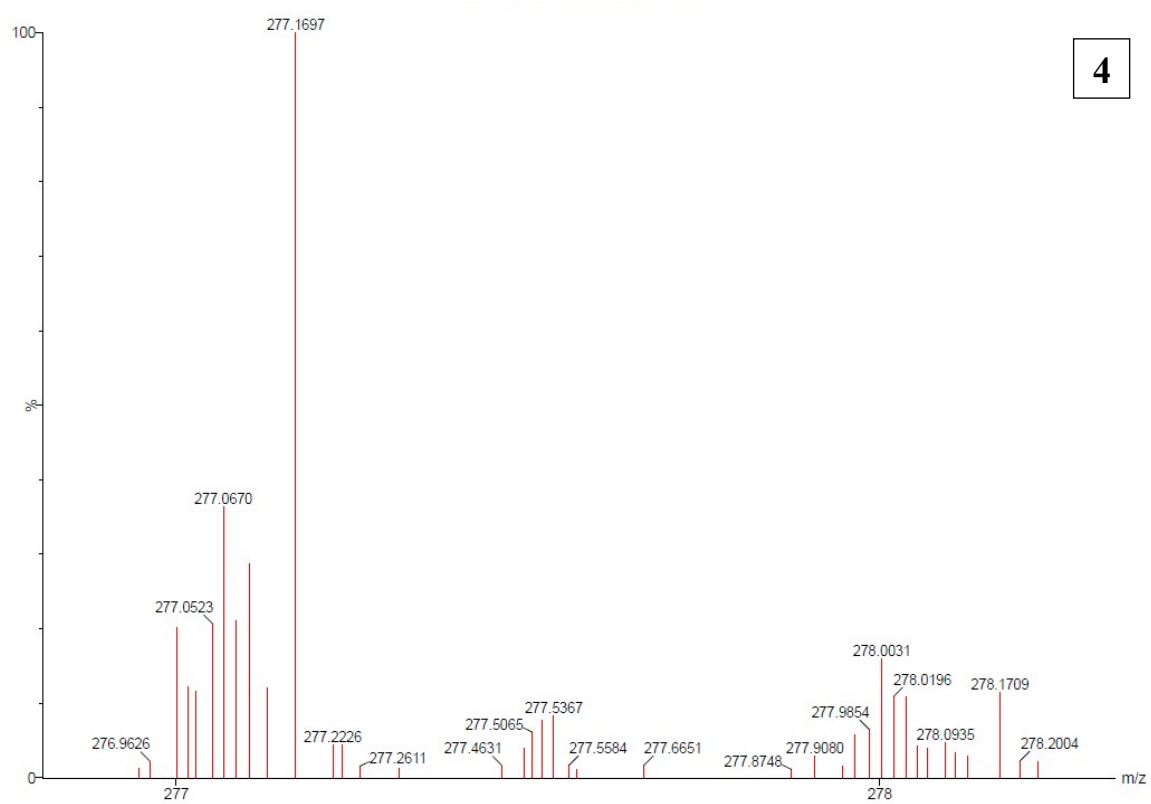

**Fig. S4. Mass spectra of 3-4.**

## XPS Spectroscopy

In compound **2**, the Co 2p peaks appeared at 781.9 eV ( $2p_{3/2}$ ) and 797.8 eV ( $2p_{1/2}$ ), with a  $\Delta E_{3/2-1/2}$  binding energy gap of two peaks of 15.1 eV, confirming the presence of cobalt is in the  $\text{Co}^{2+}$  oxidation state as shown in **Fig. S6** along with their corresponding peaks (785.9 and 802.4 eV). The O 1s peak at 532.58 eV also corresponded to the hydroxyl group, **Fig. S6**. Three significant peaks of the C 1s spectrum showed at 285.0 eV (C-C), 286.4 eV (C-O-C), and 288.5 eV (O=C-OH), consistent with the carboxyl group,<sup>S1</sup> as shown in **Fig. S6**. Similarly, compound **3** contains Zn 2p, C 1s, and O 1s peaks. The Zn 2p peaks appeared at 1022.8 eV ( $2p_{3/2}$ ) and 1045.28 eV ( $2p_{1/2}$ ), with a binding energy difference  $\Delta E_{3/2-1/2}$  of 23.2 eV, confirming that zinc exists in  $\text{Zn}^{2+}$  oxidation state, as shown in **Fig. S7**. The O 1s peak around 532.28 eV corresponded to the hydroxyl group in **Fig. S7**. C 1s peaks at 284.6 eV (C-C), 286.38 eV (C-O), and 288.78 eV (C=O), indicating the presence of the carboxyl group in **Fig. S7**. Similarly, for compound **4**, peaks corresponding to Zn 2p, C 1s, and O 1s were identified. The Zn 2p spectrum exhibited two peaks at 1022.28 eV ( $2p_{3/2}$ ) and 1045.38 eV ( $2p_{1/2}$ ), with a  $\Delta E_{3/2-1/2}$  of 23.1 eV, indicating that the zinc is in the  $\text{Zn}^{2+}$  oxidation state, as shown in **Fig. S8**. The O1s spectrum, with a peak at 532.18 eV, corresponds to the oxygen atom in the hydroxyl group, as shown in **Fig. S8**. The C 1s spectrum displayed three peaks at 284.78 eV (C-C), 286.48 eV (C-O), and 288.88 eV (C=O), confirming the presence of the carboxyl group as shown in **Fig. S8**.

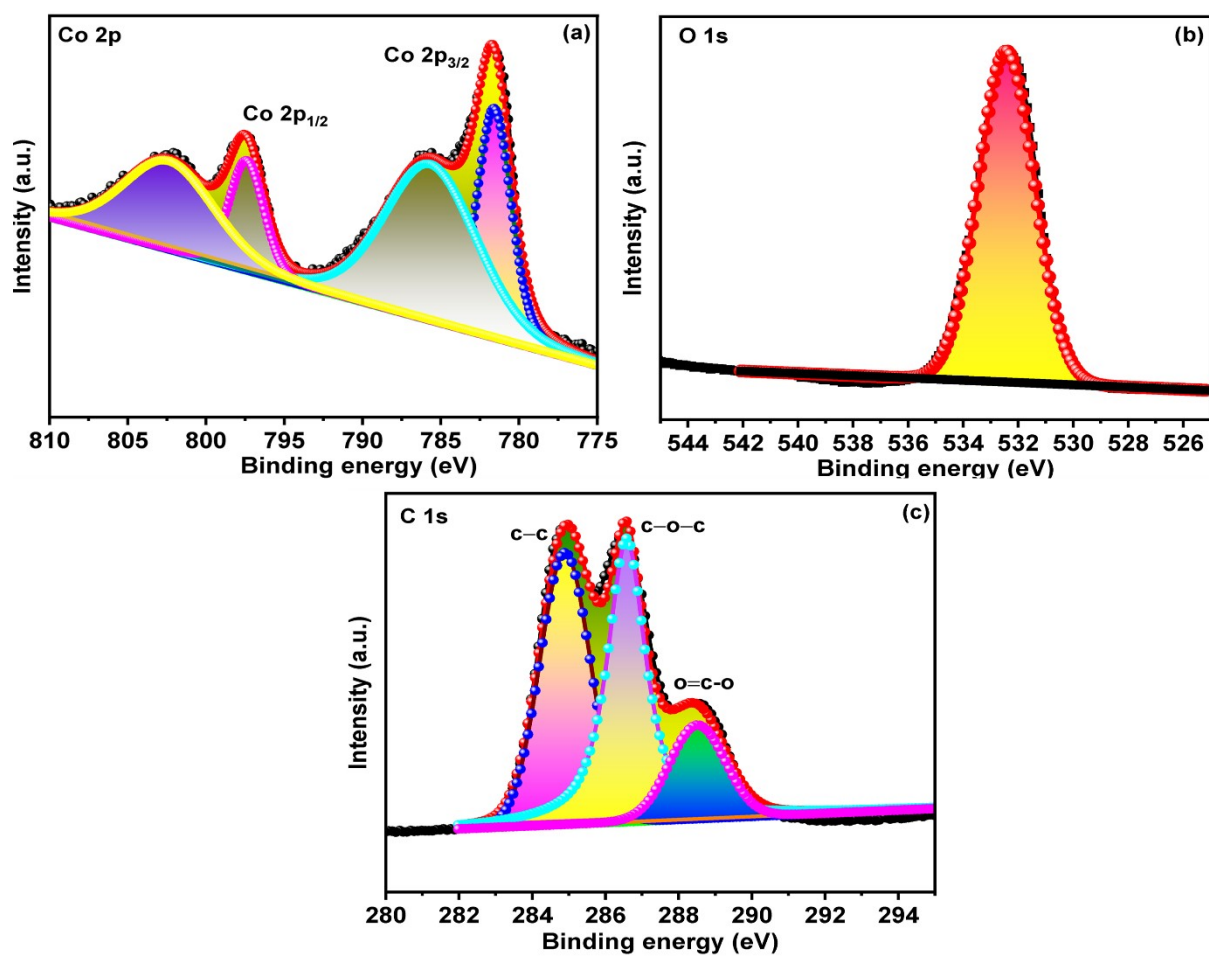

Fig. S5. XPS survey spectra of 1: Co 2p, O1s and C1s

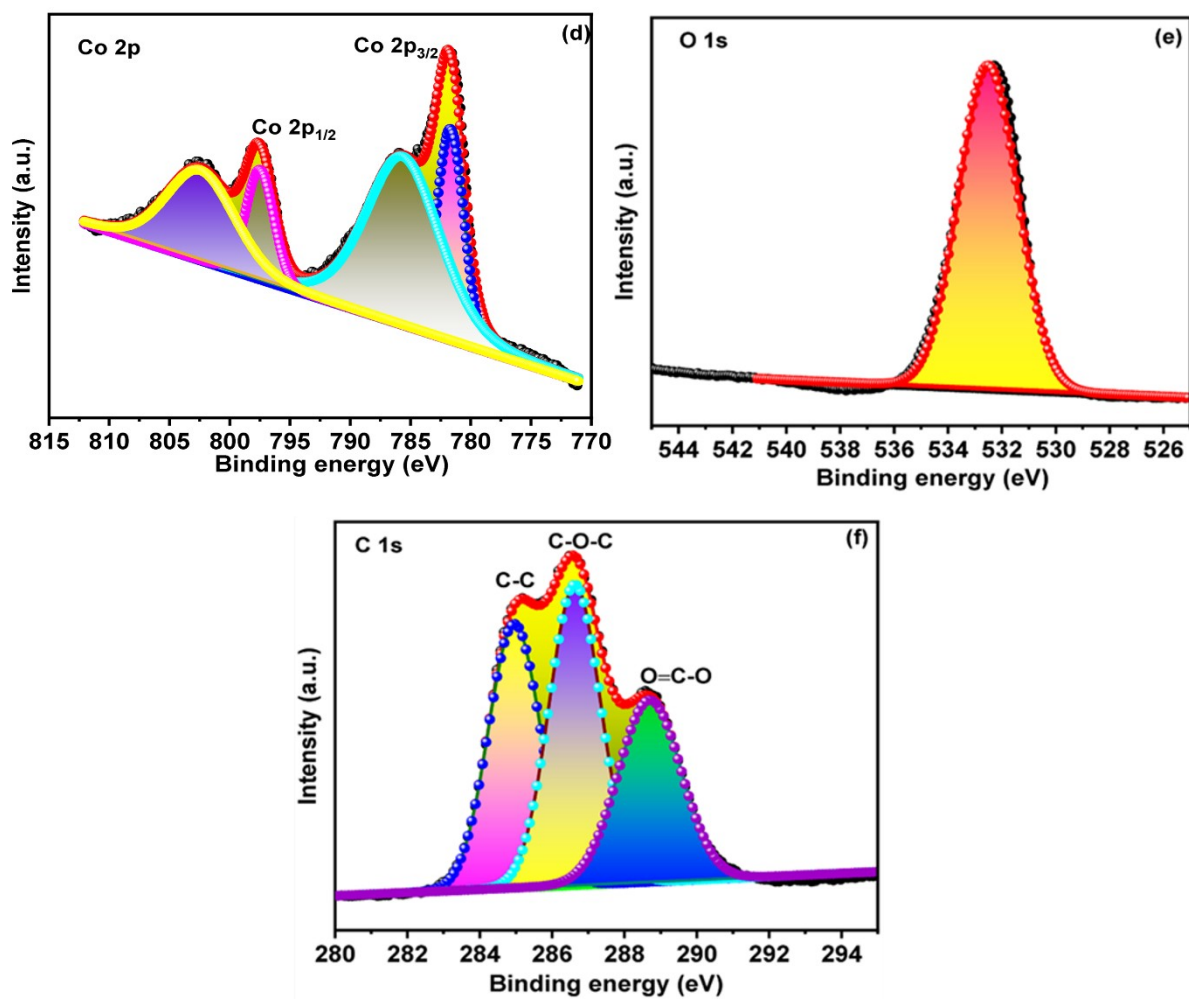

Fig. S6. XPS survey spectra of **2**: Co 2p, O1s and C1s



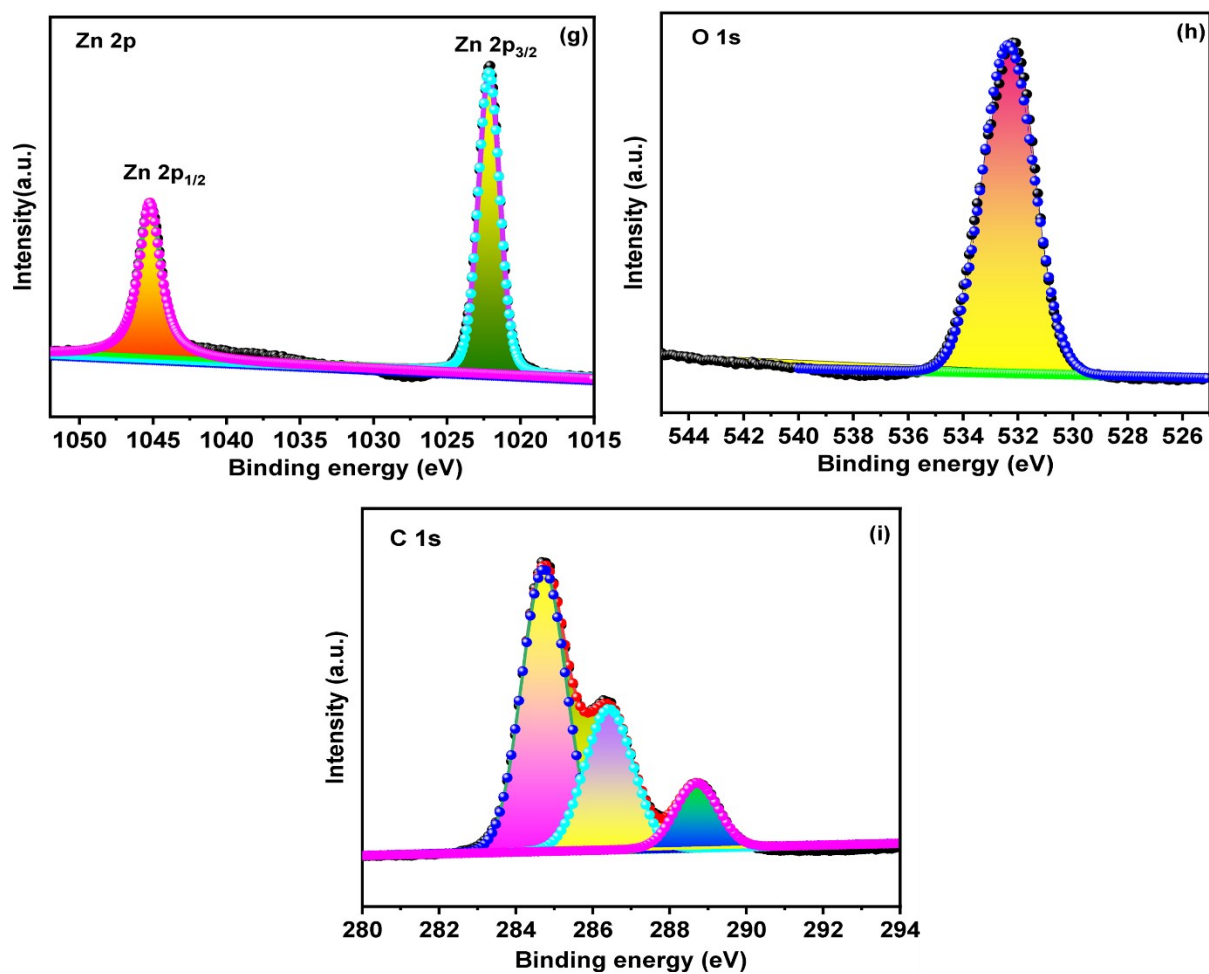

**Fig. S7.** XPS survey spectra of **3**: Co 2p, O1s and C1s

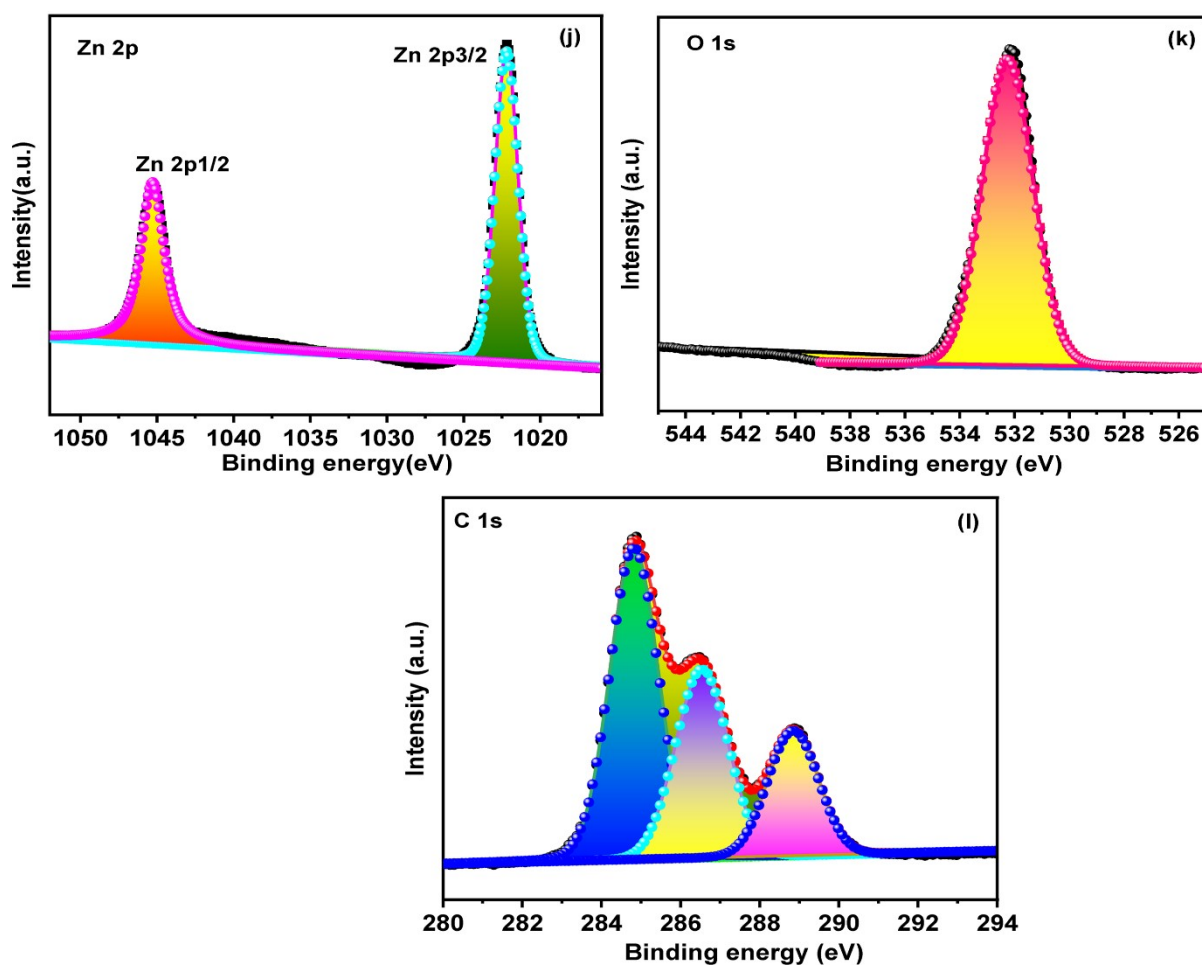

Fig. S8. 4: Zn 2p, O1s and C1s.

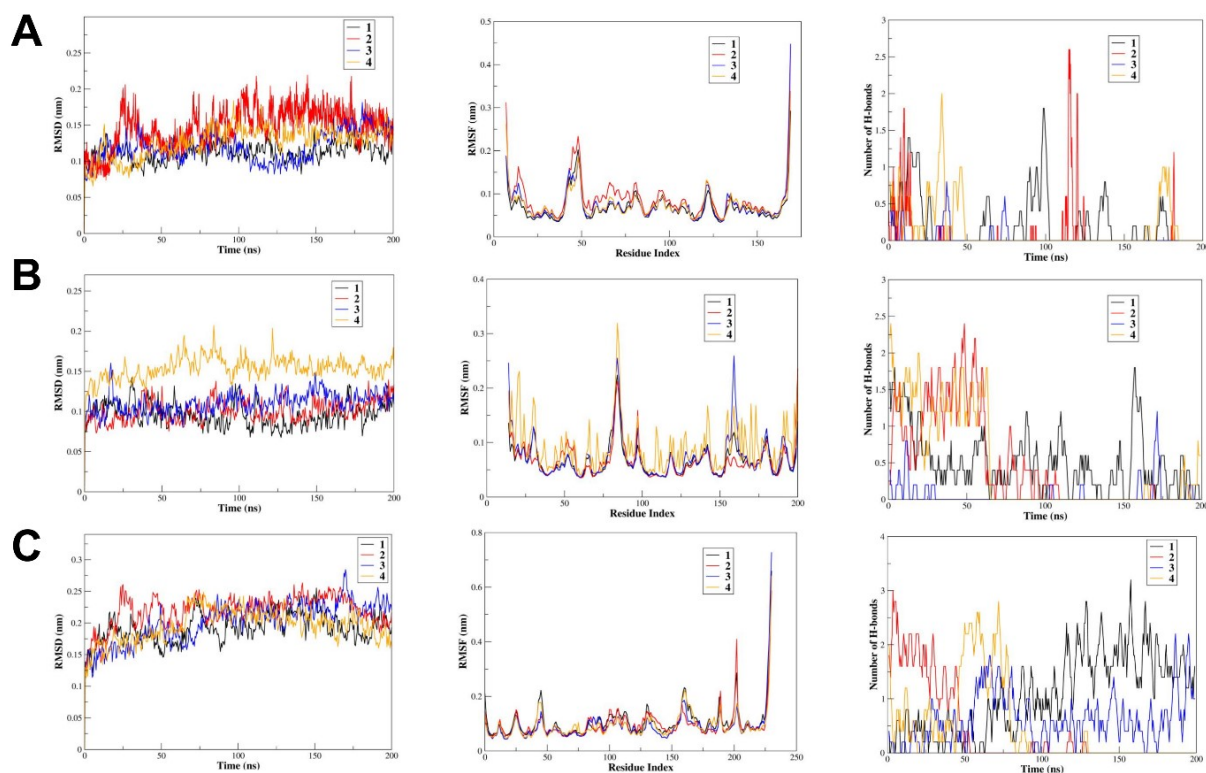

**Fig. S9:** The root mean square deviation (RMSD), root mean square fluctuation (RMSF), and the number of hydrogen bonds (H-bonds) values for complexes of compounds **1**, **2**, **3**, and **4** against LasR protein receptor of *Pseudomonas aeruginosa* (**B**), *Escherichia coli* gyrase B (**A**), and LcpA ligase from *Bacillus subtilis* (**C**) as calculated from 200 ns all-atom molecular dynamics simulations.

**Table S5.** Inhibitory percentages of metal salt( $\text{Co}(\text{OAc})_2 \cdot 4\text{H}_2\text{O}$ ) at various concentrations against the three strains.

| Concentration<br>( $\mu\text{g/mL}$ ) | <i>E. coli</i>   | <i>P. aeruginosa</i> | <i>B. subtilis</i> |
|---------------------------------------|------------------|----------------------|--------------------|
| 125                                   | 12.0 $\pm$ 0.13  | 15.1 $\pm$ 0.009     | 12.6 $\pm$ 0.05    |
| 250                                   | 16.6 $\pm$ 0.05  | 23.1 $\pm$ 0.04      | 18.9 $\pm$ 0.01    |
| 500                                   | 23.2 $\pm$ 0.01  | 28.2 $\pm$ 0.04      | 22.9 $\pm$ 0.05    |
| 600                                   | 49.6 $\pm$ 0.02  | 48.0 $\pm$ 0.03      | 43.0 $\pm$ 0.01    |
| 800                                   | 64.1 $\pm$ 0.05  | 57.7 $\pm$ 0.008     | 50.3 $\pm$ 0.02    |
| 1000                                  | 65.30 $\pm$ 0.02 | 63.1 $\pm$ 0.01      | 52.4 $\pm$ 0.05    |

**Table S6.** Inhibitory percentages of metal salt( $\text{Zn}(\text{OAc})_2 \cdot 2\text{H}_2\text{O}$ ) at various concentrations against the three strains.

| Concentrations<br>( $\mu\text{g/mL}$ ) | <i>E. coli</i>   | <i>P. aeruginosa</i> | <i>B. subtilis</i> |
|----------------------------------------|------------------|----------------------|--------------------|
| 125                                    | 8.45 $\pm$ 0.006 | 6.69 $\pm$ 0.005     | 4.0 $\pm$ 0.05     |
| 250                                    | 14.7 $\pm$ 0.03  | 13.7 $\pm$ 0.039     | 8.93 $\pm$ 0.001   |
| 500                                    | 17.9 $\pm$ 0.002 | 16.7 $\pm$ 0.027     | 18.2 $\pm$ 0.05    |
| 600                                    | 24.7 $\pm$ 0.005 | 20.6 $\pm$ 0.01      | 23.9 $\pm$ 0.01    |
| 800                                    | 40.7 $\pm$ 0.001 | 32.6 $\pm$ 0.007     | 27.0 $\pm$ 0.03    |
| 1000                                   | 53.0 $\pm$ 0.01  | 50.1 $\pm$ 0.01      | 44.6 $\pm$ 0.1     |

**Table S7.** Inhibitory percentages of parent ligand ( $\text{H}_2\text{toua}$ ) at various concentrations against the three strains.

| Concentrations<br>( $\mu\text{g/mL}$ ) | <i>E. coli</i>   | <i>P. aeruginosa</i> | <i>B. subtilis</i> |
|----------------------------------------|------------------|----------------------|--------------------|
| 125                                    | 22.2 $\pm$ 0.009 | 7.72 $\pm$ 0.01      | 4.05 $\pm$ 0.13    |
| 250                                    | 24.9 $\pm$ 0.004 | 13.7 $\pm$ 0.09      | 10.3 $\pm$ 0.01    |
| 500                                    | 31.6 $\pm$ 0.01  | 22.1 $\pm$ 0.05      | 11.2 $\pm$ 0.010   |
| 600                                    | 31.4 $\pm$ 0.007 | 34.4 $\pm$ 0.03      | 16.1 $\pm$ .004    |
| 800                                    | 51.9 $\pm$ 0.05  | 43.2 $\pm$ 0.08      | 22.5 $\pm$ 0.04    |
| 1000                                   | 57.9 $\pm$ 0.04  | 45.8 $\pm$ 0.07      | 30.3 $\pm$ 0.005   |

**Table S8.** Inhibitory percentages of parent ligand( $\text{H}_2\text{eoba}$ ) at various concentrations against the three strains.

| Concentrations<br>( $\mu\text{g/mL}$ ) | <i>E. coli</i>   | <i>P. aeruginosa</i> | <i>B. subtilis</i> |
|----------------------------------------|------------------|----------------------|--------------------|
| 125                                    | 17.1 $\pm$ 0.04  | 8.79 $\pm$ 0.05      | 1.17 $\pm$ 0.007   |
| 250                                    | 21.9 $\pm$ 0.004 | 5.38 $\pm$ 0.01      | 10.9 $\pm$ 0.01    |
| 500                                    | 26.8 $\pm$ 0.01  | 42.5 $\pm$ 0.005     | 10.4 $\pm$ 0.03    |
| 600                                    | 43.8 $\pm$ 0.03  | 55.5 $\pm$ 0.01      | 15.9 $\pm$ 0.001   |
| 800                                    | 49.7 $\pm$ 0.01  | 56.5 $\pm$ 0.2       | 23.7 $\pm$ 0.006   |
| 1000                                   | 57.42 $\pm$ 0.09 | 48.5 $\pm$ 0.01      | 36.9 $\pm$ 0.2     |

## References

- S1. N. Joshi, L. F. da Silva, F. M. Shimizu, V. R. Mastelaro, J.-C. M'Peko, L. Lin and O. N. Oliveira Jr, *Microchim. Acta*, 2019, 186, 418.
